# Supplementary material for: Efficient photoelectrochemical Kolbe C–C coupling at BiVO4 electrodes under visible light irradiation
Source: Royal Society of Chemistry journal article supplement (doi:10.1039/d2gc04423d), 2023-01-01
Supplement: d2gc04423d1.pdf [file d2gc04423d1.pdf]

## Electronic Supplementary Information

### Efficient Photoelectrochemical C-C coupling at BiVO<sub>4</sub> Electrodes under Visible Light Irradiation

*William A. Swansborough-Aston,<sup>a</sup> Ayman Soltan,<sup>a</sup> Ben Coulson,<sup>b</sup> Andrew Pratt,<sup>b</sup> Victor Chechik,<sup>a</sup> Richard E. Douthwaite<sup>a</sup>*

<sup>a</sup>Department of Chemistry, University of York, York, YO10 5DD, UK.

<sup>b</sup>Department of Physics, University of York, Heslington, York, YO10 5DD, UK

#### Contents

|                                                   |    |
|---------------------------------------------------|----|
| Materials and methods .....                       | 2  |
| Powder x-ray diffraction .....                    | 3  |
| Energy dispersive spectroscopy .....              | 4  |
| X-ray photoelectron spectroscopy.....             | 5  |
| Diffuse reflectance spectroscopy .....            | 7  |
| GC headspace analysis.....                        | 8  |
| (Photo)electrochemistry.....                      | 9  |
| Electrochemical Impedance Spectroscopy .....      | 12 |
| Apparent quantum yield (AQY) calculation .....    | 15 |
| LSV and CPE of phenylacetic acid derivatives..... | 16 |
| CPE using a supporting electrolyte.....           | 19 |
| GC calibration curves .....                       | 20 |
| References .....                                  | 22 |

## Materials and methods

**General:** Bismuth (III) 2-ethylhexanoate and vanadyl (IV) acetylacetonate were purchased from Alfa Aesar. Ferrocene (98%) was purchased from Aldrich and purified by sublimation. FTO glass, triethylamine ( $\geq 99.5\%$ ), 2-methyl, 4-methyl, 4-methoxy and 3-methoxyphenylacetic acid, benzoic and hydrocinnamic acids were purchased from Sigma-Aldrich. Phenylacetic acid (98.5 %) was purchased from Acros Organics. 3-chloro, 4-chloro and 4-fluorophenylacetic acid, 2-phenylisobutyric and 2-phenylpropionic acids were all purchased from Fluorochem. Tetrabutylammonium hexafluorophosphate was purchased from Fluka and was recrystallised in ethanol prior to use.

## Powder x-ray diffraction

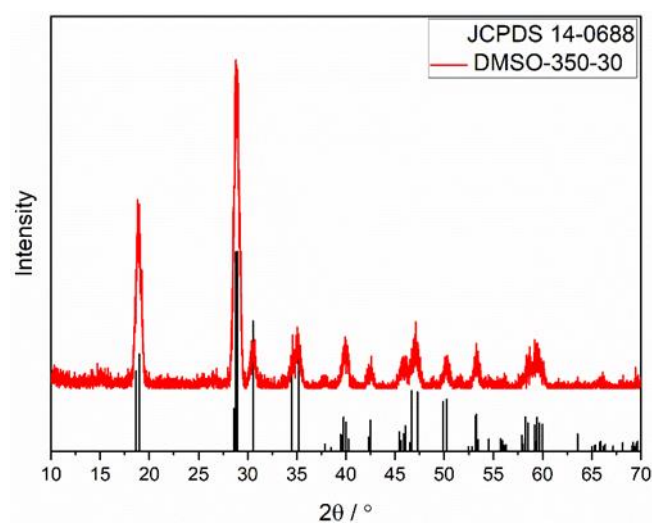

**Figure S1.** Grazing incidence X-ray diffractogram of a  $\text{BiVO}_4$  photoelectrode.

## Energy dispersive spectroscopy

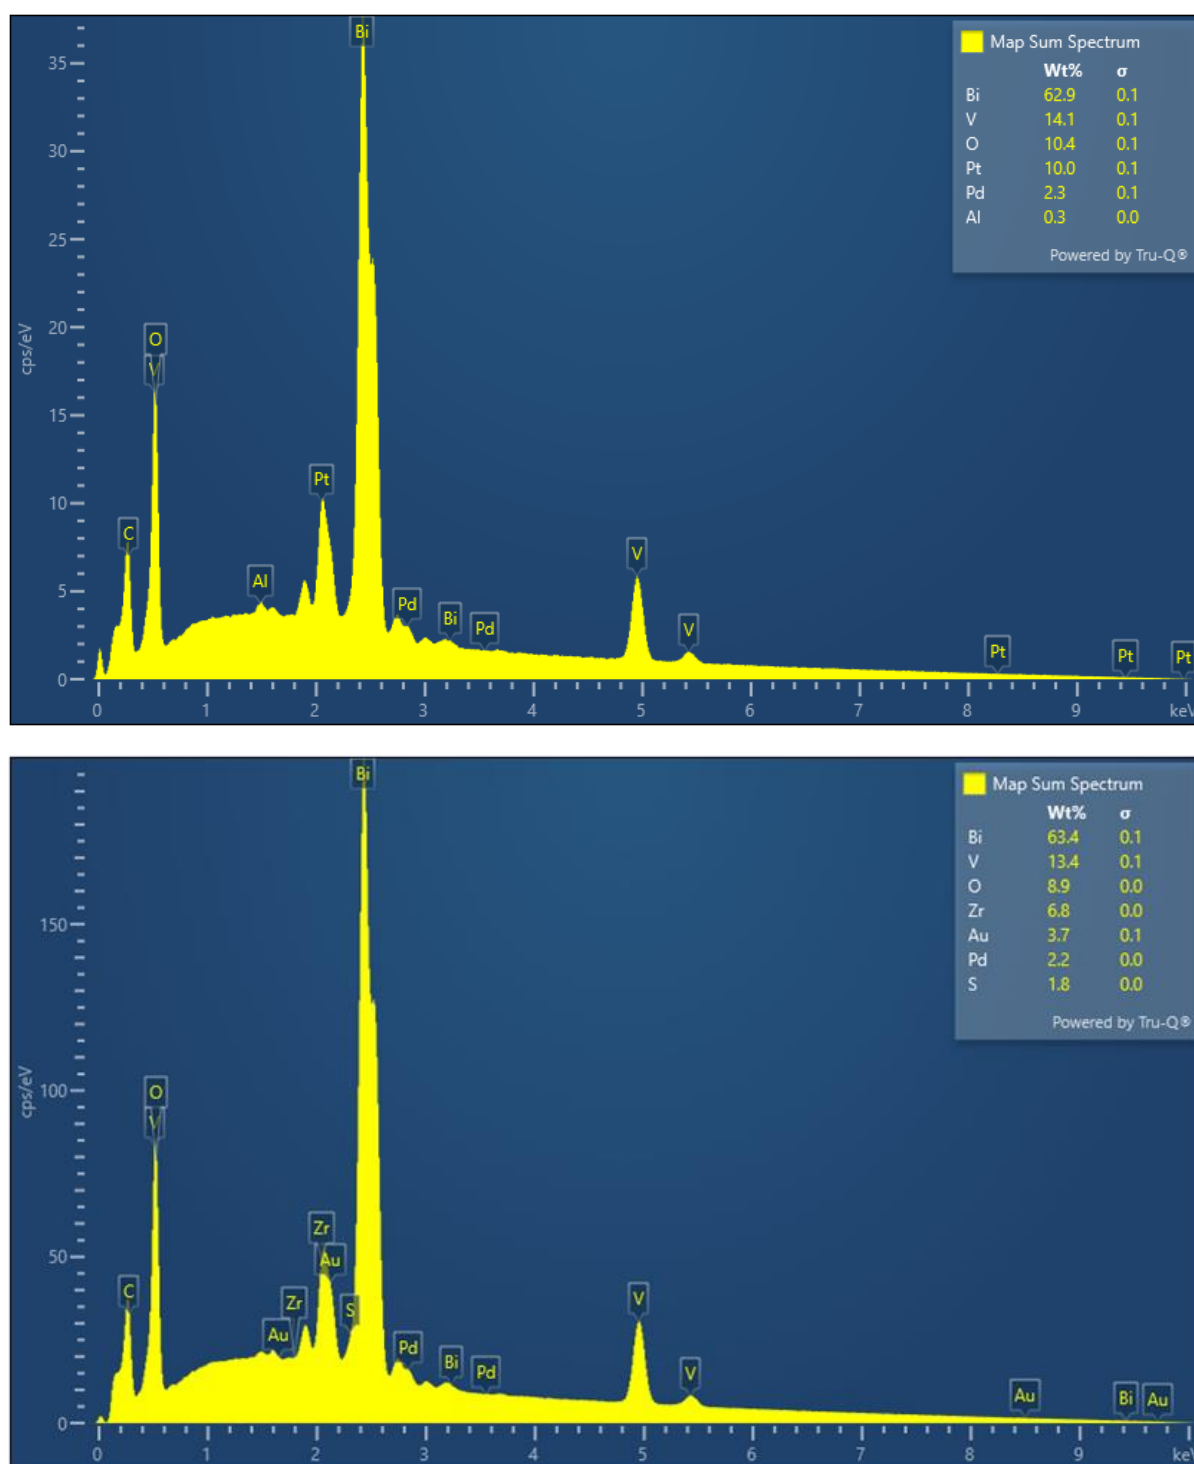

**Figure S2.** Energy dispersive X-ray spectrum of a  $\text{BiVO}_4$  photoelectrode a) before use; b) after controlled potential electrolysis of 1 M PAA with 0.05 equiv  $\text{Et}_3\text{N}$  for 3h at +0.09 V vs  $\text{Fc}/\text{Fc}^+$ .

## X-ray photoelectron spectroscopy

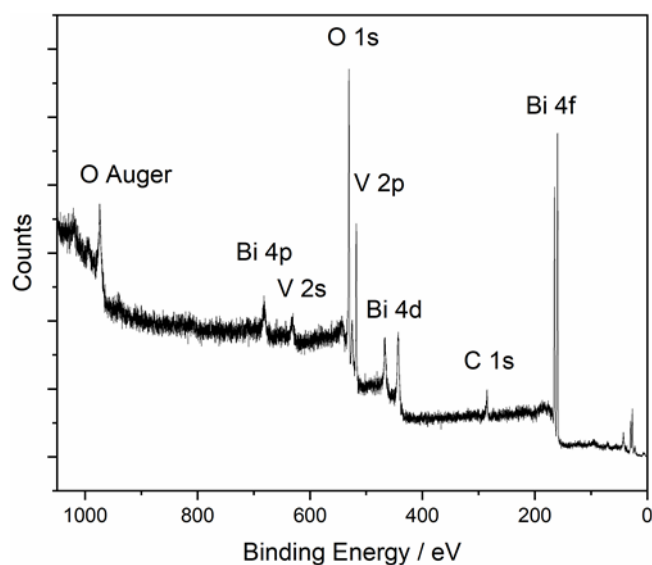

**Figure S3.** XPS survey spectrum of a  $\text{BiVO}_4$  photoelectrode prepared by electrostatic spray pyrolysis.

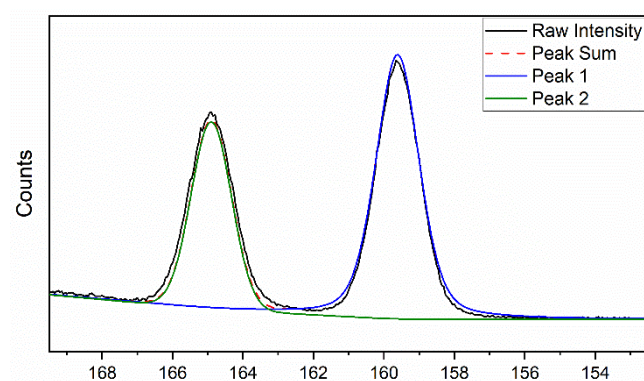

**Figure S4.** Bi 4f region and peak fitting of an XPS spectrum of a  $\text{BiVO}_4$  photoelectrode.

**Table S1.** Summary of deconvoluted XPS signals in the Bi 4f region of the XPS spectrum.

| Region | Peak | Species                   | Peak Position / eV | Peak FWHM / eV | Percentage Integration |
|--------|------|---------------------------|--------------------|----------------|------------------------|
| Bi 4f  | 1    | $\text{Bi}^{3+} 4f_{7/2}$ | 159.6              | 1.45           | 63.7                   |
|        | 2    | $\text{Bi}^{3+} 4f_{5/2}$ | 164.9              | 1.35           | 36.3                   |

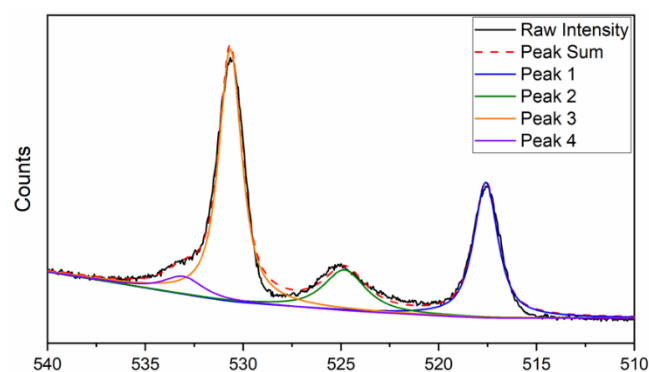

**Figure S5.** V 2p and O 1s regions and peak fitting of the XPS spectrum of a BiVO<sub>4</sub> photoelectrode.

**Table S2.** Summary of deconvoluted XPS signals in the V 2p and O 1s regions of the XPS spectrum.

| Region | Peak | Species                           | Peak Position / eV | Peak FWHM / eV | Percentage Integration |
|--------|------|-----------------------------------|--------------------|----------------|------------------------|
| V 2p   | 1    | V <sup>5+</sup> 2p <sub>3/2</sub> | 517.6              | 1.47           | 28.6                   |
|        | 2    | V <sup>5+</sup> 2p <sub>1/2</sub> | 524.8              | 2.54           | 14.8                   |
| O 1s   | 3    | Metal Oxide                       | 530.7              | 1.4            | 50.6                   |
|        | 4    | Hydroxide/Water                   | 533.1              | 2.35           | 6.1                    |

**Table S3.** XPS quantification data of a BiVO<sub>4</sub> photoelectrode surface before controlled potential electrolysis of 1 M PAA with 0.05 equiv Et<sub>3</sub>N for 3h at +0.09 V vs Fc/Fc<sup>+</sup>.

| Peak  | Centre | Integration | Factor | Int./Factor | Relative Quantity |
|-------|--------|-------------|--------|-------------|-------------------|
| Bi 4f | 159.65 | 930         | 4.25   | 218         | 1                 |
| V 2p  | 517.6  | 551         | 1.3    | 424         | 1.93              |
| O 1s  | 530.6  | 1138        | 0.66   | 1725        | 7.88              |

**Table S4.** XPS quantification data of a BiVO<sub>4</sub> photoelectrode surface after controlled potential electrolysis of 1 M PAA with 0.05 equiv Et<sub>3</sub>N for 3h at +0.09 V vs Fc/Fc<sup>+</sup>.

| Peak  | Centre | Integration | Factor | Int./Factor | Relative Quantity |
|-------|--------|-------------|--------|-------------|-------------------|
| Bi 4f | 159.85 | 952         | 4.25   | 224         | 1                 |
| V 2p  | 517.6  | 485         | 1.3    | 373         | 1.66              |
| O 1s  | 530.6  | 1008        | 0.66   | 1528        | 6.82              |

### Diffuse reflectance spectroscopy

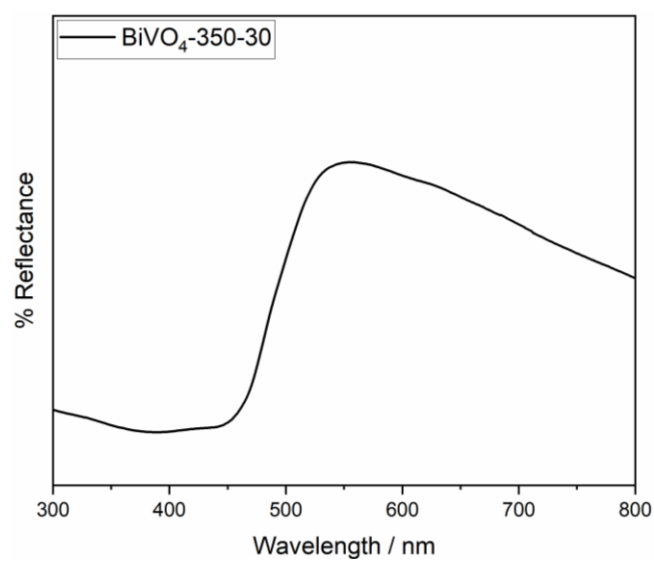

**Figure S6.** Diffuse reflectance spectrum of a BiVO<sub>4</sub> photoelectrode.

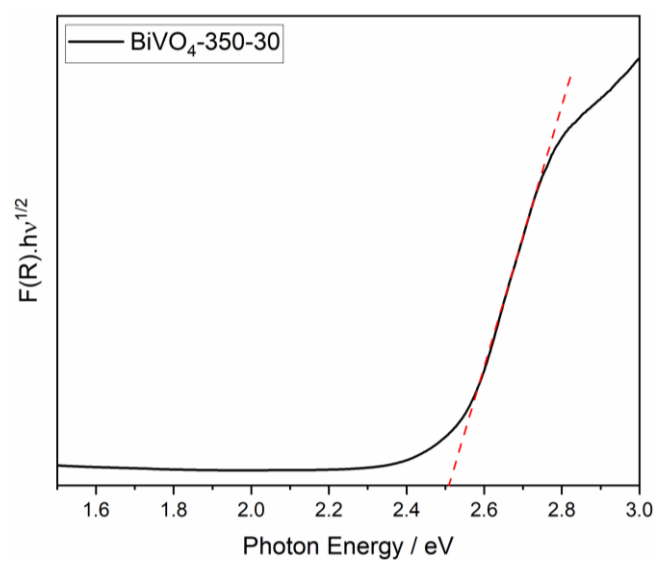

**Figure S7.** Tauc plot of a BiVO<sub>4</sub> photoelectrode showing a band gap of approximately 2.5 eV.

## GC headspace analysis

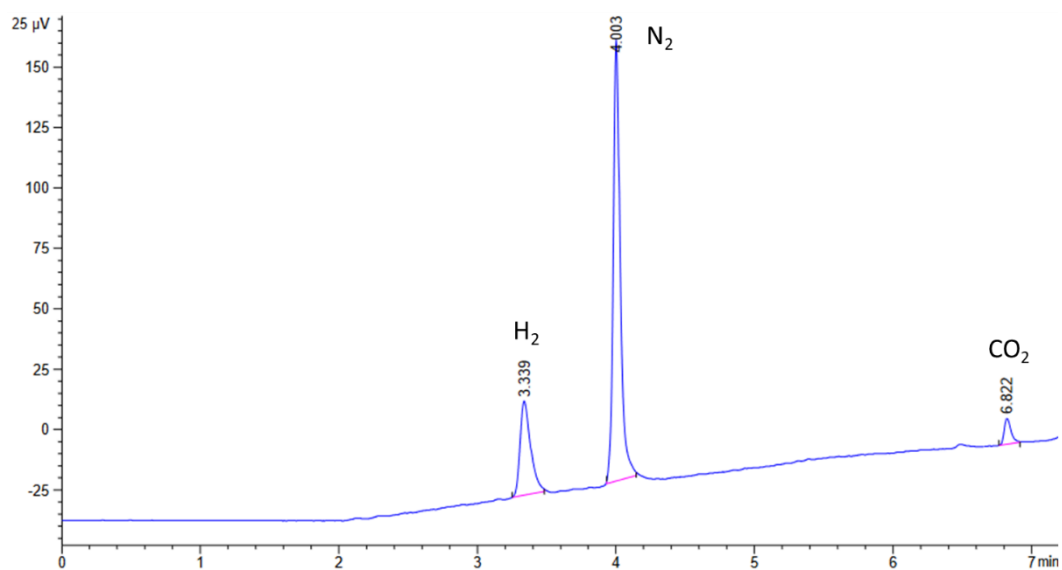

**Figure S8.** Gas chromatogram of the cell headspace after controlled potential electrolysis of 1 M PAA with 0.05 equiv  $\text{Et}_3\text{N}$  for 1h at +0.09 V vs  $\text{Fc}/\text{Fc}^+$ .

## (Photo)electrochemistry

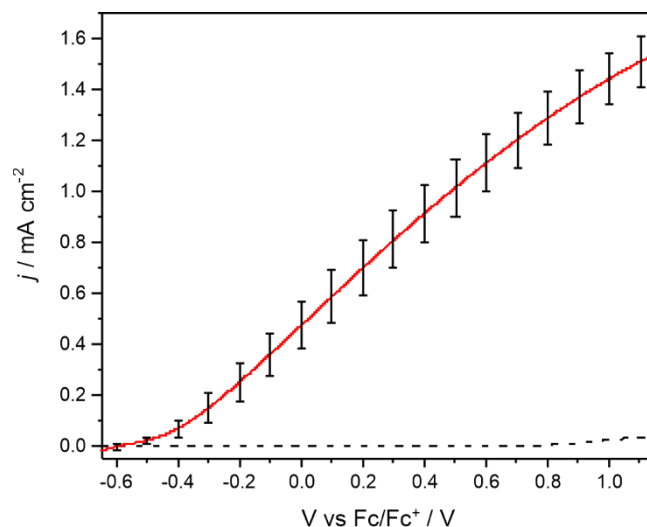

**Figure S9.** Average linear sweep voltammogram across 15 photoelectrodes in 1 M PAA and 0.05 equiv  $\text{NEt}_3$  vs  $\text{Fc/Fc}^+$  under illumination with AM 1.5G. Note all other experiments were performed using a blue LED array which gives larger photocurrents.

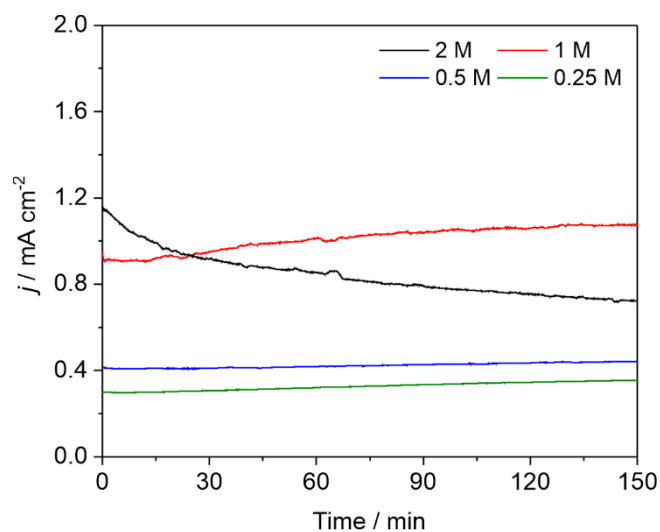

**Figure S10.** Controlled potential electrolyses of 2 M (black), 1 M (red), 0.5 M (blue) and 0.25 M (green) PAA electrolytes and 0.05 equiv  $\text{Et}_3\text{N}$  at +0.09 V vs  $\text{Fc/Fc}^+$ .

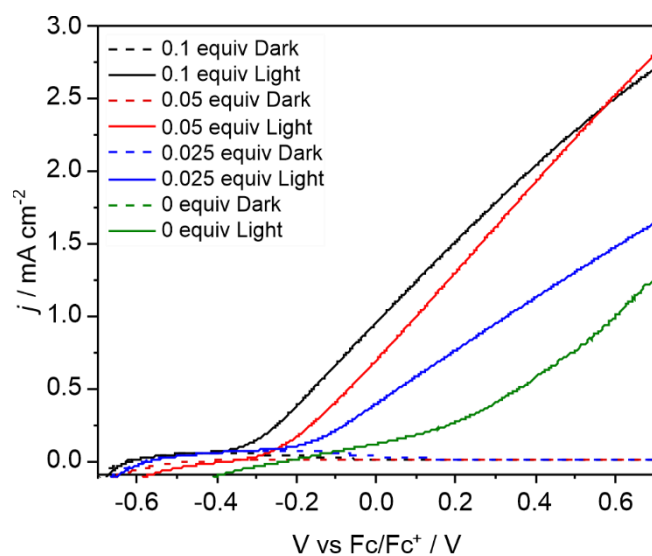

**Figure S11.** Linear sweep voltammograms of  $\text{BiVO}_4$  photoelectrodes in electrolytes containing 1 M PAA with 0.1 (black), 0.05 (red), 0.025 (blue) and 0 equiv  $\text{Et}_3\text{N}$  (green). Voltammograms were recorded in the dark (dashed) and under blue LED illumination (solid). Scan rate  $10 \text{ mV s}^{-1}$ .

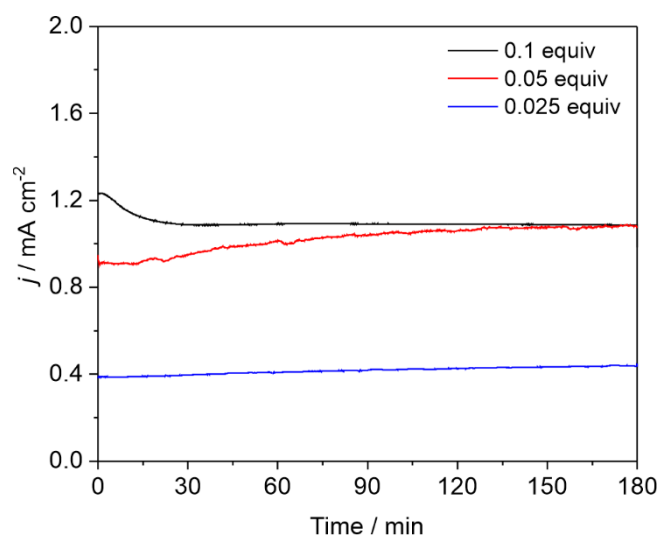

**Figure S12.** Controlled potential electrolyses of 1 M PAA solutions partially neutralised by addition of 0.1 (black), 0.05 (red) and 0.025 (blue) equiv  $\text{Et}_3\text{N}$  at  $+0.09 \text{ V vs Fc/Fc}^+$ .

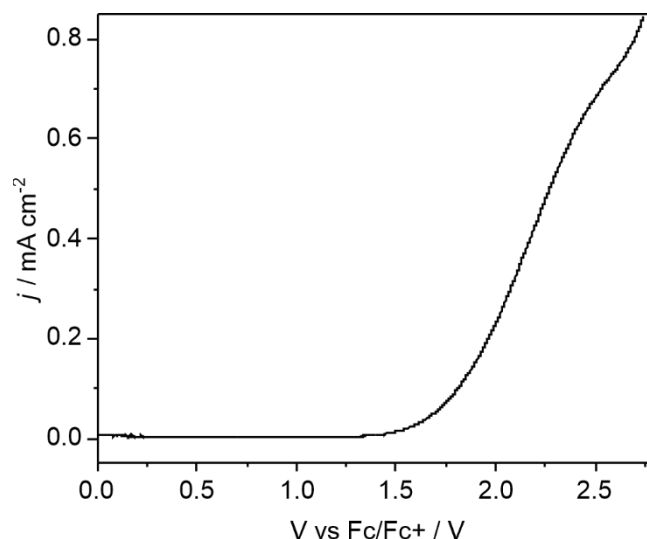

**Figure S13.** Linear sweep voltammogram in the absence of illumination of a  $\text{BiVO}_4$  photoelectrode in 1 M PAA with 0.05 equiv  $\text{Et}_3\text{N}$ .

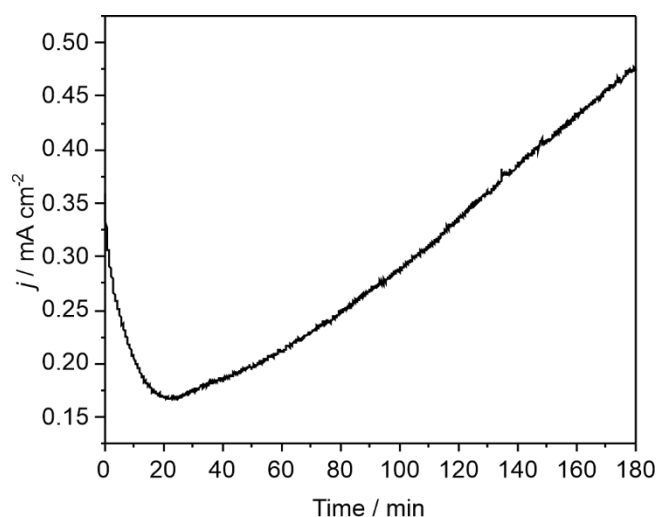

**Figure S14.** Controlled potential electrolysis in the absence of illumination of a  $\text{BiVO}_4$  photoelectrode in 1 M PAA with 0.05 equiv  $\text{Et}_3\text{N}$  at 2.5 V vs  $\text{Fc/Fc}^+$ .

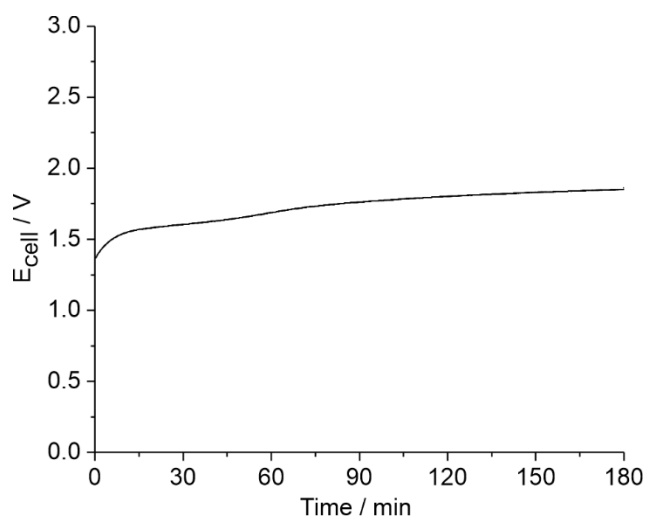

**Figure S15.** Cell voltage measured during controlled potential electrolyses of 1 M PAA solution partially neutralised by addition of 0.05 equiv  $\text{Et}_3\text{N}$  at +0.09 V vs  $\text{Fc/Fc}^+$ .

## Electrochemical Impedance Spectroscopy

Impedance spectra were initially fitted using a modified Randles cell, with cell series resistance,  $R_s$ , bulk capacitance,  $C_{\text{bulk}}$ , and bulk charge transfer resistance,  $R_{\text{ct,bulk}}$ , elements to model charge transfer within the semiconductor. A second constant phase element and resistor in parallel were added to model charge transfer resistance,  $R_{\text{ct}}$ , and space-charge capacitance,  $Q_{\text{SC}}$ , at the electrode surface.

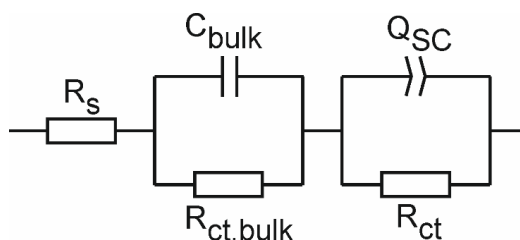

Capacitance values can be calculated from constant-phase elements using:

$$C_{\text{SC}} = \frac{(Q_{\text{SC}} R_{\text{ct}})^{1/n}}{R_{\text{ct}}}$$

Where  $C_{\text{SC}}$  is the space-charge capacitance and  $n$  is the constant phase element exponent, extracted from fitting of impedance data.<sup>1</sup> The impedance response of porous films can be understood through the use of transmission line models, however correlating a large number of model parameters to real chemical processes is often difficult.<sup>2, 3</sup> Similar equivalence cells have been used to model  $\text{Fe}_2\text{O}_3$  photoelectrodes in photoelectrochemical C-H amination reactions in non-aqueous media.<sup>4</sup>

For the fitting of impedance spectra in 50 mM 4-Cl-PAA solutions, a similar equivalence cell as before was used, though a Warburg diffusion element,  $W_H$ , was included to account for the linear behaviour observed at low frequency caused by diffusion within the Helmholtz layer.

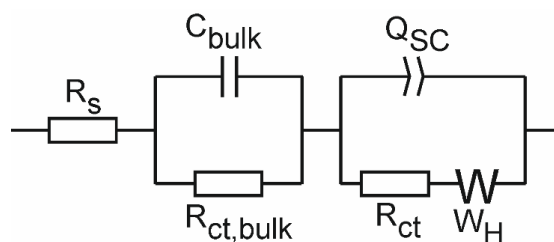

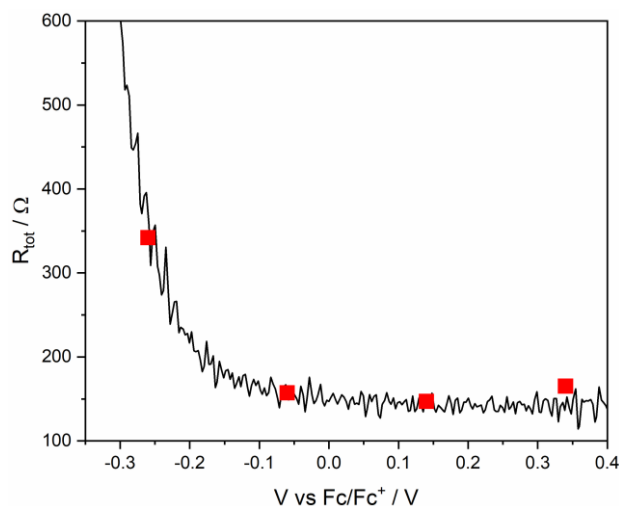

**Figure S16.** Total cell resistance ( $R_{tot}$ ) calculated from linear sweep voltammograms of a  $\text{BiVO}_4$  photoelectrode in 1 M 4-Cl-PAA electrolyte (black line).  $R_{tot}$  estimated from fitting of impedance spectra (red squares). The validity of impedance fitting using the equivalence cell shown in Fig. 5a was tested by comparison of total resistance,  $R_{tot}$ , measured by LSV and calculated from Table S6.<sup>5</sup> For impedance measurements,  $R_{tot}$  was taken as the summation of all resistances ( $R_s + R_{ct,bulk} + R_{ct}$ ).  $R_{tot}$  for LSV measurements was calculated using:

$$R_{tot} = \left( A_s \frac{dJ}{dV} \right)^{-1}$$

Where  $A_s$  is the electrode area, and  $dJ/dV$  is the differentiated voltammogram.

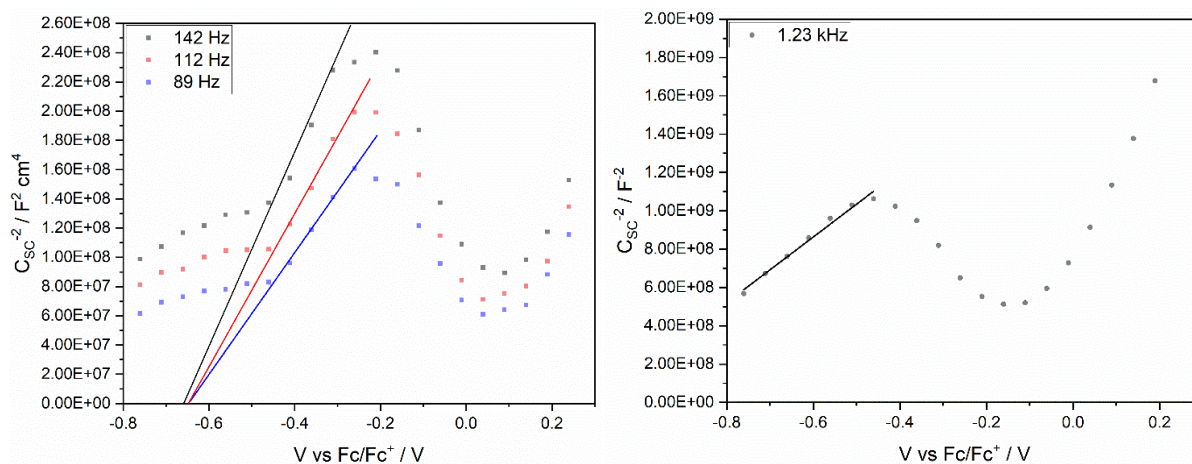

**Figure S17.** Mott-Schottky plots of a  $\text{BiVO}_4$  photoelectrode in a) 1 M 4-Cl-PAA with 0.05 equiv  $\text{Et}_3\text{N}$  at 142 (black), 112 (red) and 89 Hz (blue); b) Mott-Schottky plot of a  $\text{BiVO}_4$  photoelectrode in 0.05 M 4-Cl-PAA solutions containing 0.1 M  $\text{TBAPF}_6$ . Due to the prevalence of the Warburg diffusion element at low frequency, Mott-Schottky plot was acquired at 1.23 kHz.

**Table S5:** Flat band potentials and donor densities of BiVO<sub>4</sub> photoelectrodes extracted from Mott-Schottky analysis. Donor density values were calculated using geometric area in absence of active surface area and a relative permittivity of  $\epsilon = 86$ .

| [4-Cl PAA] <sup>a</sup> / M | Frequency / Hz | Flat Band Potential vs Fc/Fc <sup>+</sup> / V | N <sub>D</sub> (x10 <sup>19</sup> ) / cm <sup>-3</sup> |
|-----------------------------|----------------|-----------------------------------------------|--------------------------------------------------------|
| 1.0                         | 142            | -0.645                                        | 1.18                                                   |
| 1.0                         | 112            | -0.644                                        | 1.48                                                   |
| 1.0                         | 89             | -0.649                                        | 1.82                                                   |
| 0.05 <sup>a, b</sup>        | 1230           | -1.10                                         | 0.28                                                   |

<sup>a</sup> with added 0.05 equiv Et<sub>3</sub>N, <sup>b</sup> with added 0.1 M TBAPF<sub>6</sub>

**Table S6.** Comparison of parameters extracted from the fitting of impedance spectra for an illuminated BiVO<sub>4</sub> photoelectrode in 1 M and 0.05 M 4-Cl-PAA electrolyte.

| [4-Cl PAA] <sup>a</sup> / M | V / V | R <sub>s</sub> / $\Omega$ | C <sub>bulk</sub> / $\mu$ F | R <sub>ct,bulk</sub> / $\Omega$ | C <sub>SC</sub> / $\mu$ F | R <sub>ct</sub> / $\Omega$ |
|-----------------------------|-------|---------------------------|-----------------------------|---------------------------------|---------------------------|----------------------------|
| 1.0                         | -0.26 | 53.12                     | 0.972                       | 8.226                           | 380.8                     | 280.8                      |
| 1.0                         | -0.06 | 52.84                     | 0.912                       | 9.971                           | 150.5                     | 94.52                      |
| 1.0                         | 0.14  | 52.33                     | 0.844                       | 10.52                           | 117.8                     | 84.26                      |
| 0.05 <sup>a, b</sup>        | -0.06 | 19.64                     | 39.5                        | 6.37                            | 422.4                     | 430.9                      |

<sup>a</sup> with added 0.05 equiv Et<sub>3</sub>N, <sup>b</sup> with added 0.1 M TBAPF<sub>6</sub>

### Apparent quantum yield (AQY) calculation

4-chlorophenylacetic acid (1.71 g, 10 mmol) was dissolved in dry, degassed MeCN (10 mL) and 0.05 equiv triethylamine (0.07 mL, 0.5 mmol) was added. 8 mL of this solution was added to a photoelectrochemical cell, with a 3-electrode configuration using a BiVO<sub>4</sub> working electrode, a Pt counter electrode, and an Ag wire reference electrode isolated in a Luggin capillary. Controlled potential electrolyses were undertaken at +0.09 V vs Fc/Fc<sup>+</sup> for 1 min under blue LED illumination ( $\lambda = 450$  nm, 32 mW cm<sup>-2</sup>). Incident photon to current efficiency (IPCE) was calculated as the ratio of photocurrent to the total number of photons irradiating the electrode.

$$\text{Number of Electrons} = \frac{ItN_A}{F}$$

Where  $i$  = photocurrent,  $t$  = time,  $N_A$  = Avogadro's number and  $F$  = Faraday constant

$$\text{Number of Incident Photons} = \frac{Y_e A \lambda}{hc}$$

Where  $Y_e$  = irradiance at the photoelectrode,  $A$  = geometric electrode area,  $\lambda$  = incident photon wavelength (450 nm),  $h$  = Planck's constant, and  $c$  = speed of light in a vacuum.

The apparent quantum yield (AQY) was calculated as the product of IPCE and Faradaic Efficiency for the Kolbe product.

For the electrolysis of 1 M 4-Cl-PAA under 32.2 mW cm<sup>-2</sup> irradiance:

$$\text{Number of Electrons} = \frac{2.1 \text{ mA} \times 1 \text{ s} \times 6.022 \times 10^{23}}{96485 \text{ s A mol}^{-1}} = 1.31 \times 10^{16}$$

$$\text{Number of Incident Photons} = \frac{32.2 \text{ mW cm}^{-2} \times 1.5 \text{ cm}^2 \times 450 \times 10^{-9} \text{ m}}{6.63 \times 10^{-34} \text{ m}^2 \text{ kg s}^{-1} \times 3 \times 10^8 \text{ m s}^{-1}} = 1.085 \times 10^{17}$$

$$\text{IPCE} = \frac{1.3 \times 10^{16}}{1.085 \times 10^{17}} \times 100\% = 12.1\%$$

$$\text{AQY} = 12.1\% \times 0.99 = 12.0\%$$

For context an IPCE = 100%, gives a theoretical  $i = 17.4$  mA and  $j = 11.6$  mA cm<sup>-2</sup>.

**Table S7.** Light intensity dependence of 1 M PAA with 0.05 equiv. NEt<sub>3</sub> in acetonitrile.

| Irradiance / mW cm <sup>-2</sup> | Ave. Photocurrent @ +0.09 V vs Fc/Fc <sup>+</sup> / mA | Photon-to-Current Efficiency / % |
|----------------------------------|--------------------------------------------------------|----------------------------------|
| 32.2                             | 2.10                                                   | 12.1                             |
| 16.5                             | 1.81                                                   | 20.2                             |
| 9.70                             | 1.28                                                   | 24.2                             |

## LSV and CPE of phenylacetic acid derivatives

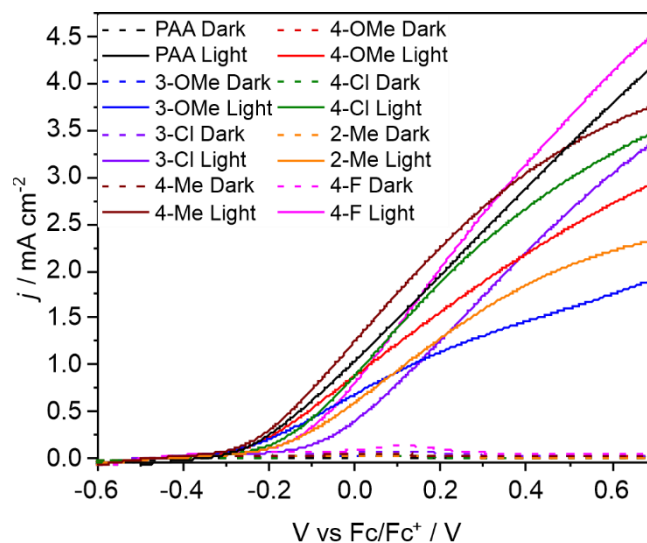

**Figure S18.** Linear sweep voltammograms of  $\text{BiVO}_4$  photoelectrodes in 1 M of substituted phenylacetic acids with 0.05 equiv  $\text{Et}_3\text{N}$  compared to 1 M PAA (black). Voltammograms were recorded in the presence (solid) and absence (dashed) of blue LED illumination.

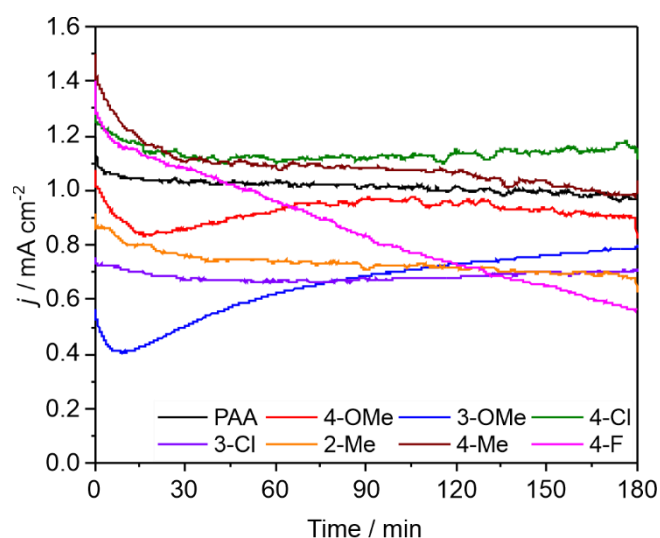

**Figure S19.** Controlled potential electrolyses of 1 M electrolytes of substituted phenylacetic acids with 0.05 equiv  $\text{Et}_3\text{N}$  at +0.09 V vs  $\text{Fc}/\text{Fc}^+$  compared to 1 M PAA (black).

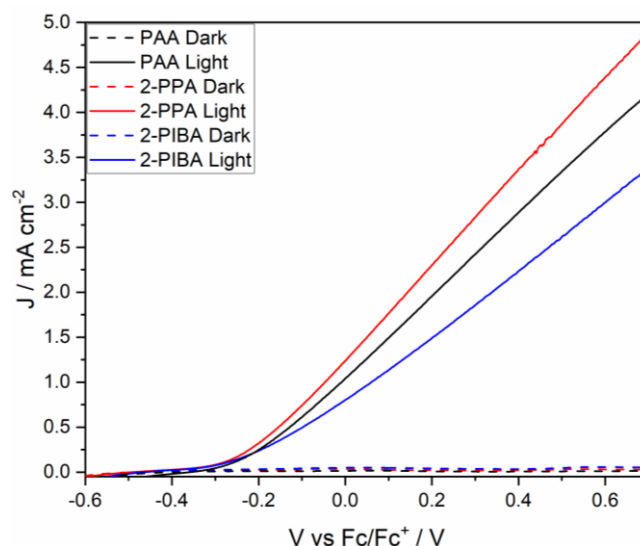

**Figure S20.** Linear sweep voltammograms of  $\text{BiVO}_4$  photoelectrodes in 1 M 2-phenylpropionic (2-PPA, red) and 2-phenylisobutyric acids (2-PIBA, blue) with 0.05 equiv  $\text{Et}_3\text{N}$  compared with 1 M PAA (black). Voltammograms were recorded in the presence (solid lines) and absence (dashed lines) of blue LED illumination.

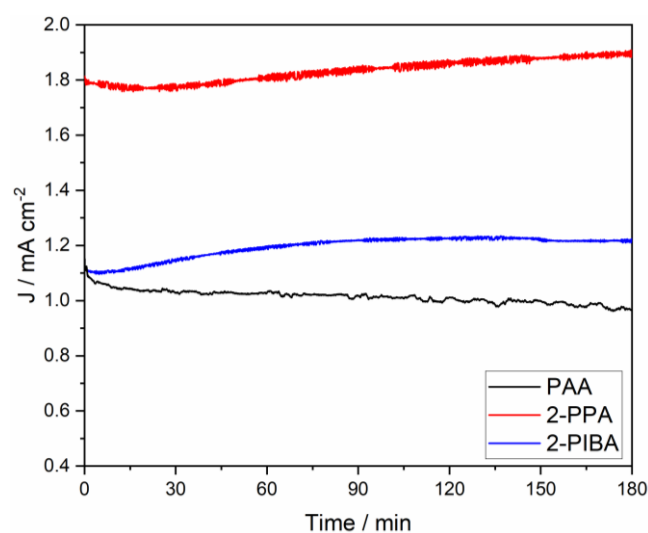

**Figure S21.** Controlled potential electrolyses of 1 M 2-phenylpropionic (red) and 2-phenylisobutyric acid (blue) with 0.05 equiv  $\text{Et}_3\text{N}$  at +0.09 V vs  $\text{Fc}/\text{Fc}^+$  compared with 1 M PAA (black).

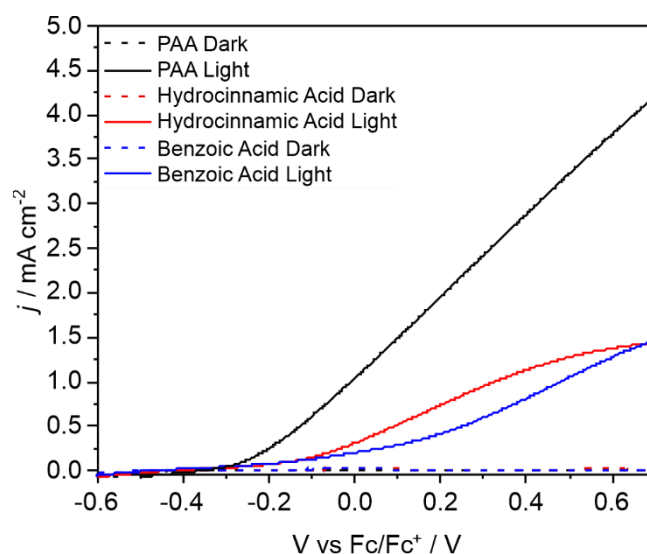

**Figure S22.** Linear sweep voltammograms of a  $\text{BiVO}_4$  photoelectrode in 1 M 3-phenyl propanoic (red) and benzoic (blue) acids with 0.05 equiv  $\text{Et}_3\text{N}$  compared to 1 M PAA (black). Voltammograms were recorded in the presence (solid) and absence (dashed) of blue LED illumination.

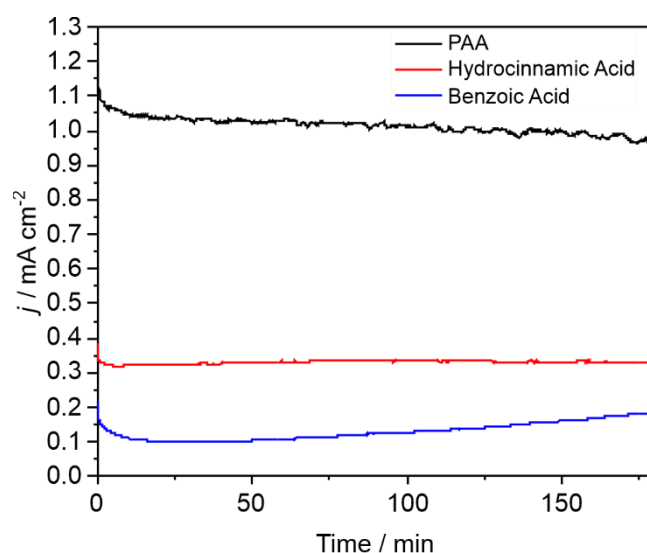

**Figure S23.** Controlled potential electrolyses of 1 M hydrocinnamic (red) and benzoic (blue) acids with 0.05 equiv  $\text{Et}_3\text{N}$  at +0.09 V vs  $\text{Fc/Fc}^+$  compared to 1 M PAA (black).

## CPE using a supporting electrolyte

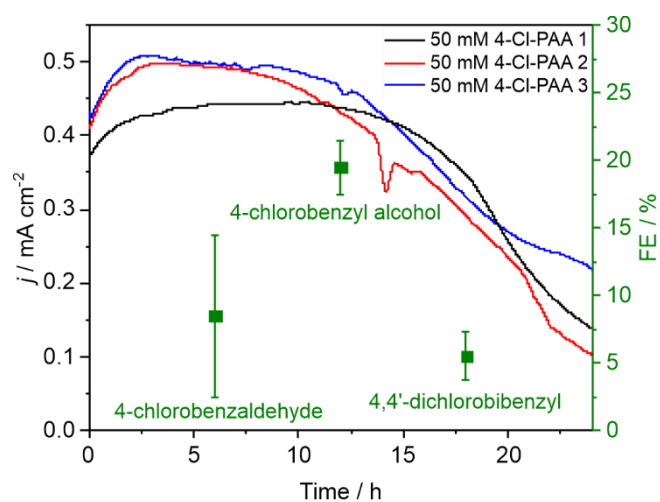

**Figure S24.** Controlled potential electrolyses using three electrodes of electrolytes containing 0.1 M TBAPF<sub>6</sub>, 0.05 M 4-Cl-PAA and 0.05 equiv Et<sub>3</sub>N at +0.25 V vs Fc/Fc<sup>+</sup> under blue LED illumination.

## GC calibration curves

Bibenzyl, benzyl alcohol and benzaldehyde were dissolved in 1:1 CH<sub>2</sub>Cl<sub>2</sub>:MeOH and chromatograms recorded in triplicate at each concentration.

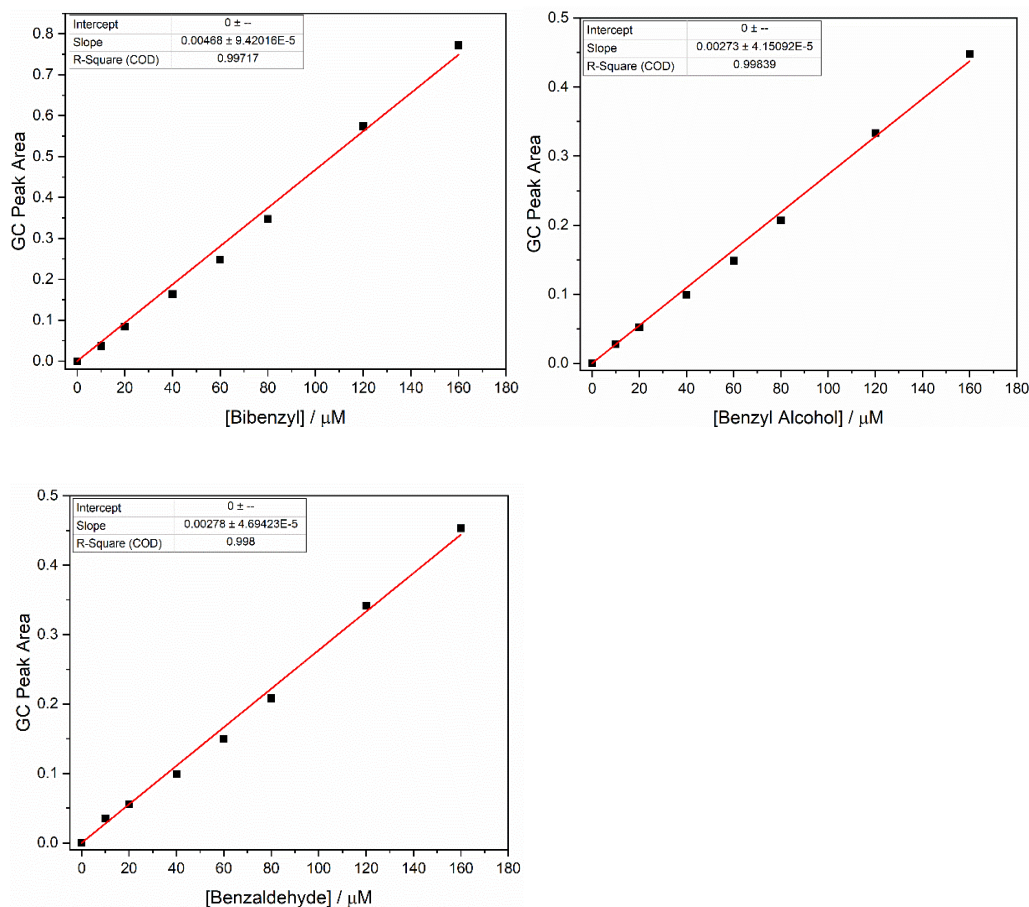

**Figure S25.** GC calibration curves for bibenzyl, benzyl alcohol, and benzaldehyde.

**Table S8.** GC retention times of acid starting materials, Kolbe and non-Kolbe products

| Acid          | Aldehyde r.t. / min | Alcohol r.t. / min | C-C Kolbe r.t. / min    | Acid r.t. / min |
|---------------|---------------------|--------------------|-------------------------|-----------------|
| PAA           | 4.57                | 5.08               | 8.84                    | 6.24            |
| 4-OMe-PAA     | 7.12                | 7.32               | nd                      | 8.50            |
| 3-OMe-PAA     | 6.22                | 6.55               | nd                      | 8.35            |
| 4-Cl-PAA      | nd <sup>a</sup>     | nd                 | 11.94                   | 7.79            |
| 2-Me-PAA      | 5.71                | 5.96               | 10.34                   | 7.05            |
| 4-Me-PAA      | 5.81                | 6.22               | 10.22                   | 7.02            |
| 3-Cl-PAA      | 5.82                | 6.83               | 11.73                   | 7.76            |
| 4-F-PAA       | 4.46                | 5.13               | 8.71                    | 6.13            |
| 2-PPA         | nd                  | nd                 | 9.26, 9.36 <sup>b</sup> | 6.45            |
| 2-PIBA        | nd                  | nd                 | 10.95                   | 6.81            |
| Benzoic       | nd                  | nd                 | nd                      | 5.47            |
| Hydrocinnamic | nd                  | 5.43               | nd                      | 6.88            |

<sup>a</sup>None detected. <sup>b</sup>retention times of diastereomers.

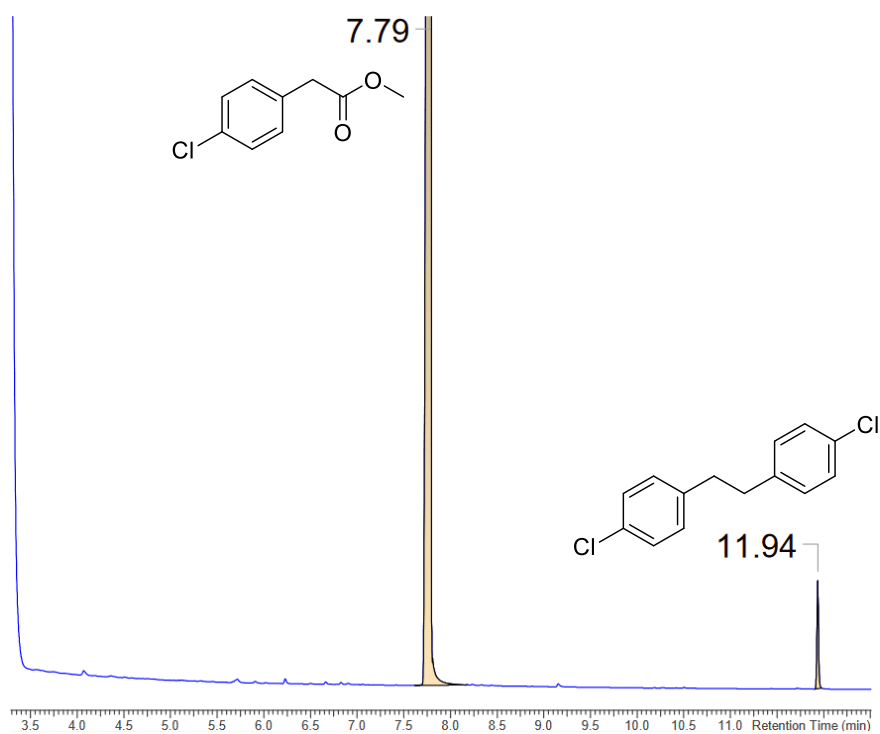

**Figure S26.** Example chromatogram of 4-Cl-PAA electrolysis products after 3 h at +0.09 V vs Fc/Fc<sup>+</sup>.

## References

1. M. E. Orazem and B. Tribollet, *Electrochim. Acta*, 2008, **53**, 7360-7366.
2. J. Bisquert, G. Garcia-Belmonte, F. Fabregat-Santiago, N. S. Ferriols, P. Bogdanoff and E. C. Pereira, *J. Phys. Chem. B*, 2000, **104**, 2287-2298.
3. F. Fabregat-Santiago, G. Garcia-Belmonte, J. Bisquert, A. Zaban and P. Salvador, *J. Phys. Chem. B*, 2002, **106**, 334-339.
4. L. Zhang, L. Liardet, J. Luo, D. Ren, M. Grätzel and X. Hu, *Nat. Catal.*, 2019, **2**, 366-373.
5. B. Klahr, S. Gimenez, F. Fabregat-Santiago, T. Hamann and J. Bisquert, *J. Am. Chem. Soc.*, 2012, **134**, 4294-4302.
